# Supplementary material for: The H3.3 chaperone Hira complex orchestrates oocyte developmental competence
Source: PubMed Central journal article supplement (PMC8959146; doi:10.1242/dev.200044), 2022-02-28
Supplement: develop-149-200044-s1.pdf [file develop-149-200044-s1.pdf]

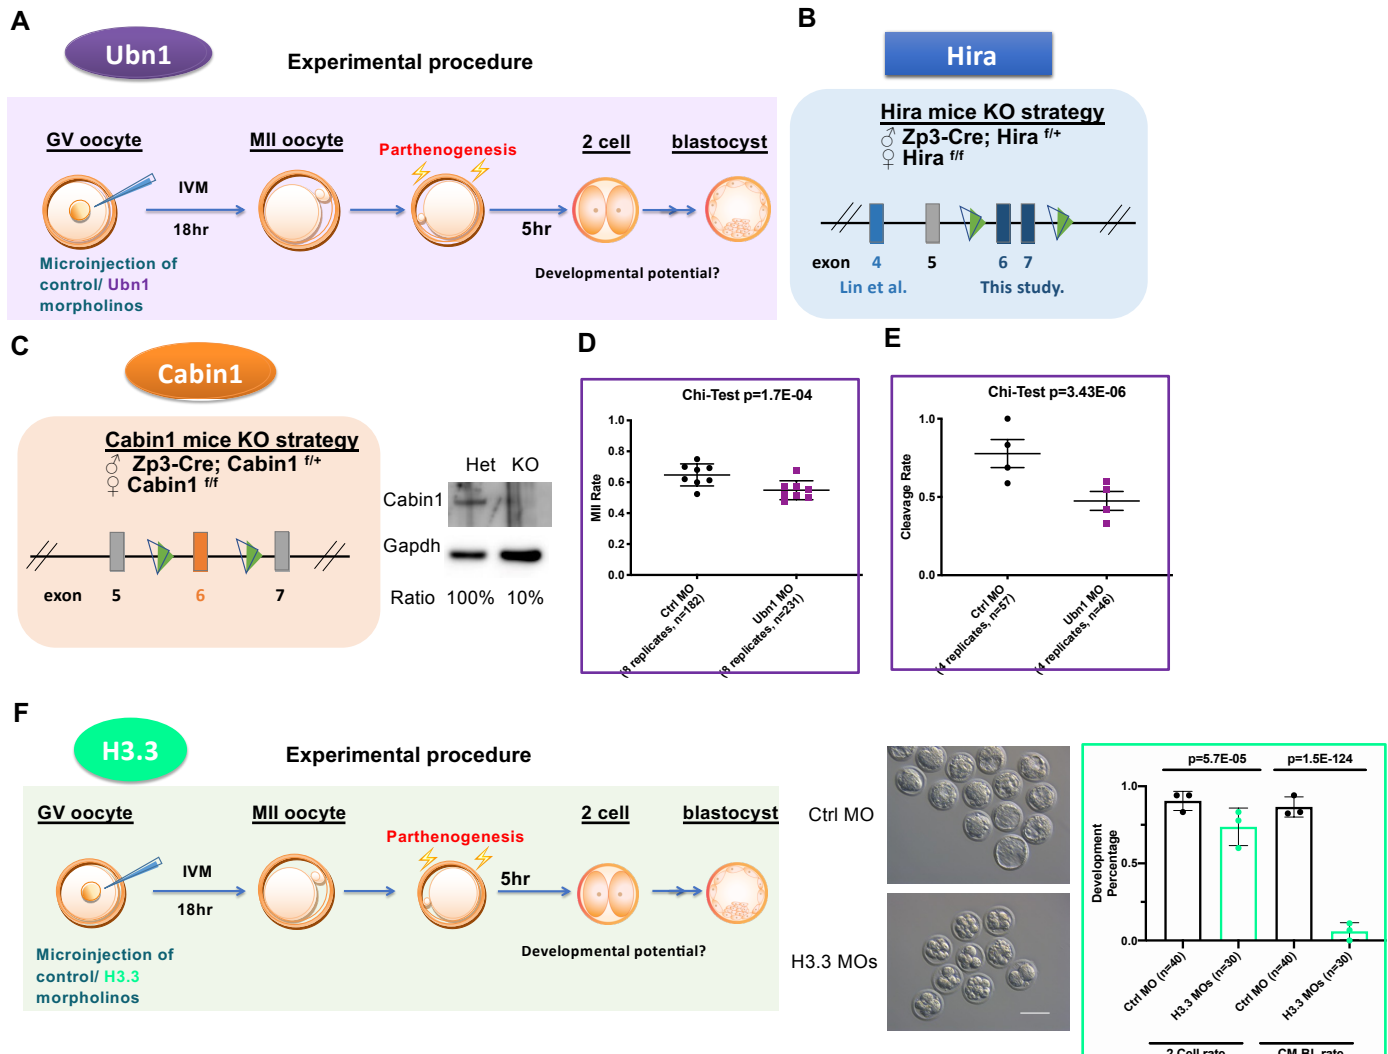

### Fig. S1. Experimental approaches for investigation of the maternal role of the Hira complex.

(A) Ubn1 knockdown and developmental assay. GV oocytes were microinjected with Ubn1 and control antisense morpholino oligos. Injected oocytes were matured *in vitro*, parthenoactivated by SrCl<sub>2</sub> for 5 hours and cultured *in vitro*. 2-cell formation and blastocyst development potential were monitored.

(B) Strategy of generation of knockout Hira in oocytes. Exon 6 and 7 regions (this study; (Rai et al., 2014)) of Hira were deleted in the oocyte using Zp3-cre recombination approach. Previous paper published by us (Lin et al., 2014) where we deleted the exon 4 region.

(C) Strategy of generation of knockout Cabin1 in oocytes. Upper panel: Exon 4 region of Cabin1 was deleted in oocytes using Zp3-cre recombination approach. Right panel: western blot validation of Cabin1 mutant (CabZ KO) and heterozygous control (CabZ Het) oocytes (n=2).

(D) Knocking down of Ubn1 in the oocyte impaired oocyte maturation potential. MII oocyte maturation rate was monitored in Ubn1 knockdown oocytes.

(E) Knocking down of Ubn1 in the oocyte impaired embryo cleavage. 2-cell formation rate was monitored in Ubn1 knockdown oocytes.

(F) Maternal H3.3 is required for preimplantation development of parthenogenetically activated embryos. Upper panel: H3.3 knockdown approach was similar to Ubn1 knockdown. Lower panel: 2-cell formation and morula-to-blastocyst rate of H3.3 knockdown embryos was impaired. Scale bar: 100µm.

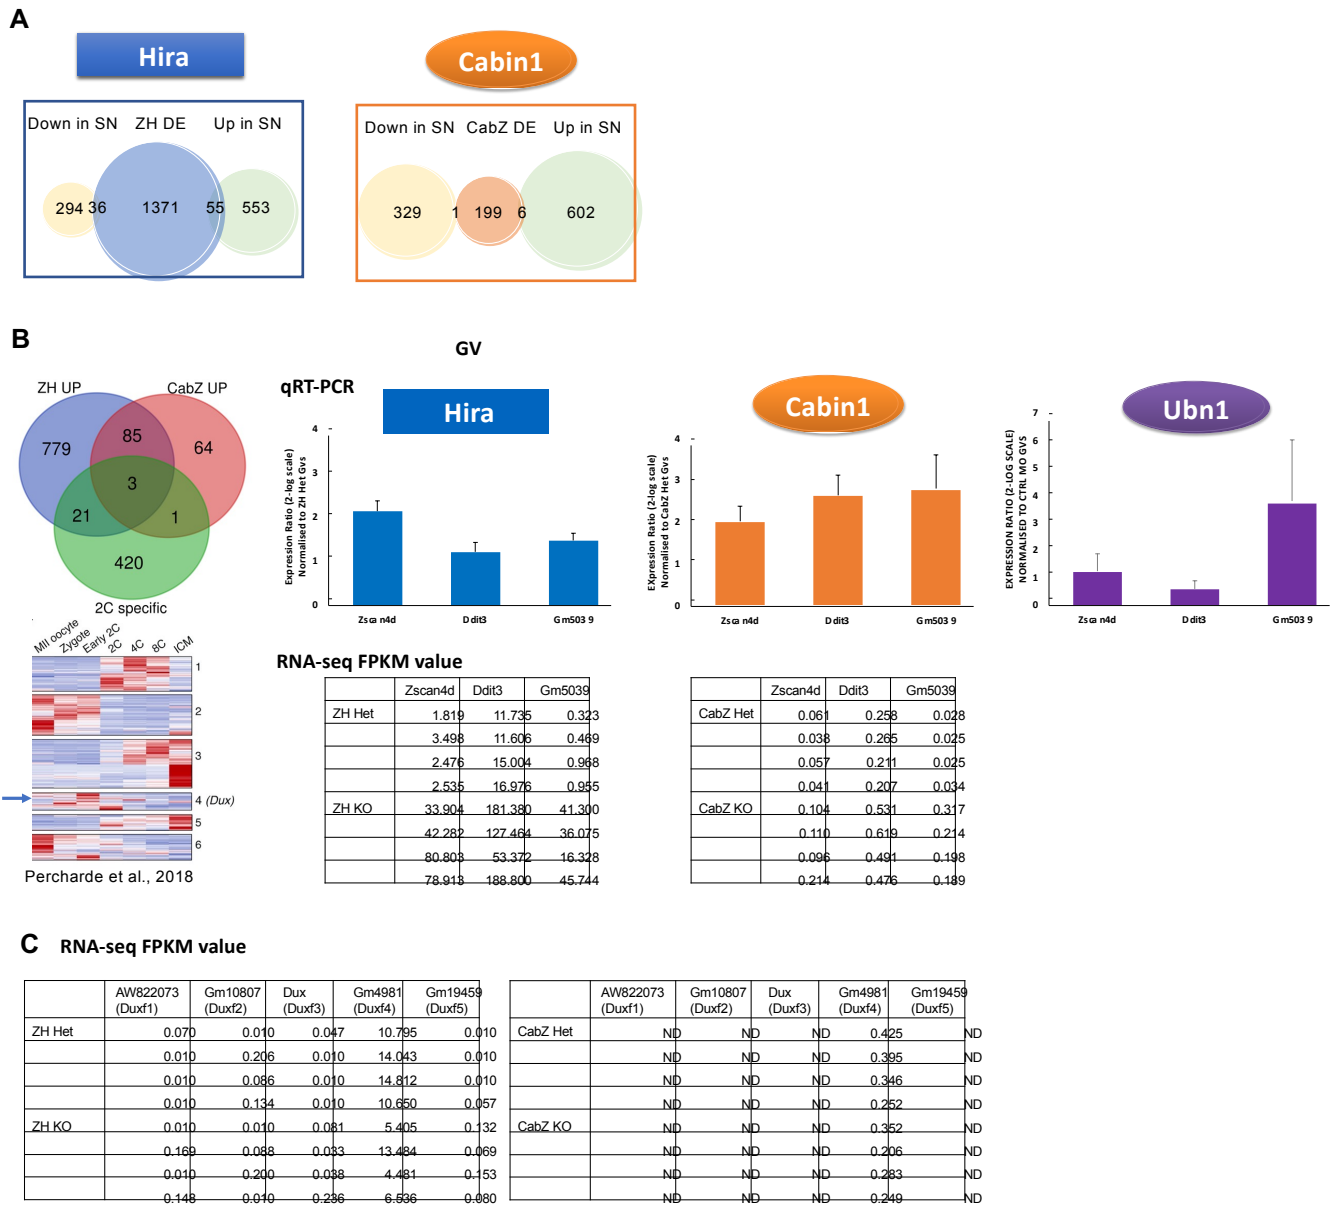

**Fig. S2. Bioinformatic analyses of RNA-seq results of Hira and Cabin1 mutant GV oocytes.**

(A) Minimal overlapping of genes from either Hira or Cabin1 differentially expressed genes within growing oocytes (surrounded-nucleus, SN).

(B) A subset of 2 cell specific genes derepressed in both Hira and Cabin1 mutant GV oocytes. Left panels: Venn-diagram shows the overlapping genes which are upregulated both in the Hira and Cabin1 mutant (ZH KO and Cab KO) GV oocytes. Upper right panel: qRT-PCR confirmed the selected upregulated genes, Zscan4d, Gm5039, and Ddit3, in both ZH and CabZ KO mutant GV oocytes and Ubn1 knockdown GV oocytes. Lower right panels: FPKM values of RNA-seq of Hira and Cabin1 GV oocytes respectively.

(C) Expression of Dux gene family in Hira and Cabin1 GV oocytes. Tables list the FPKM values from of Hira and Cabin1 GV RNA-seq datasets. ND: not detected.

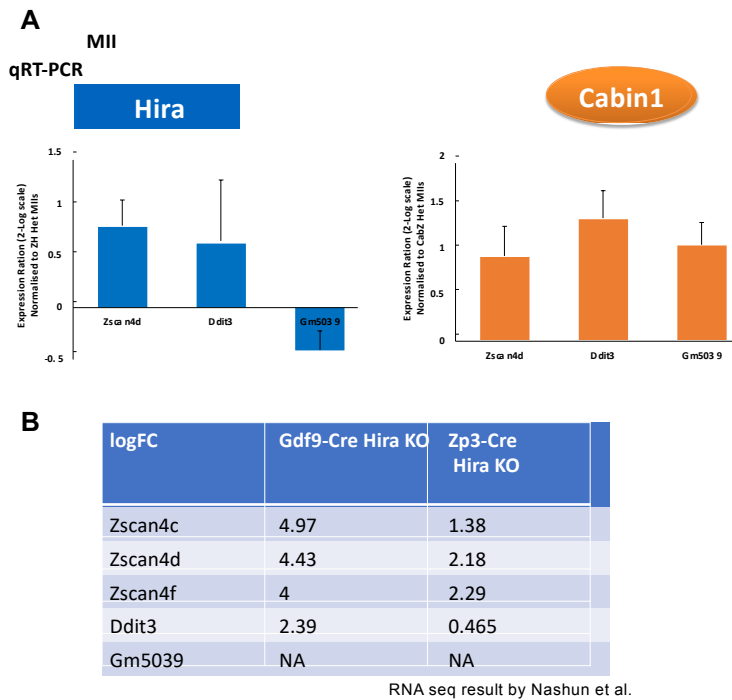

**Fig. S3. Zscan4 is upregulated in Hira and Cabin1 mutant MII oocytes and 1 cell embryos.**

(A) Zscan4 is upregulated in both Hira and Cabin1 mutant MII oocytes. qRT-PCR of Zscan4, Ddit3, and Gm5039 expression in ZH and CabZ KO MII oocytes. Expression was normalised to ZH Het and CabZ Het controls respectively.

(B) List of Zscan4 fold changes of Hira mutant MII oocytes from previously published dataset (Nashun et al., 2015).

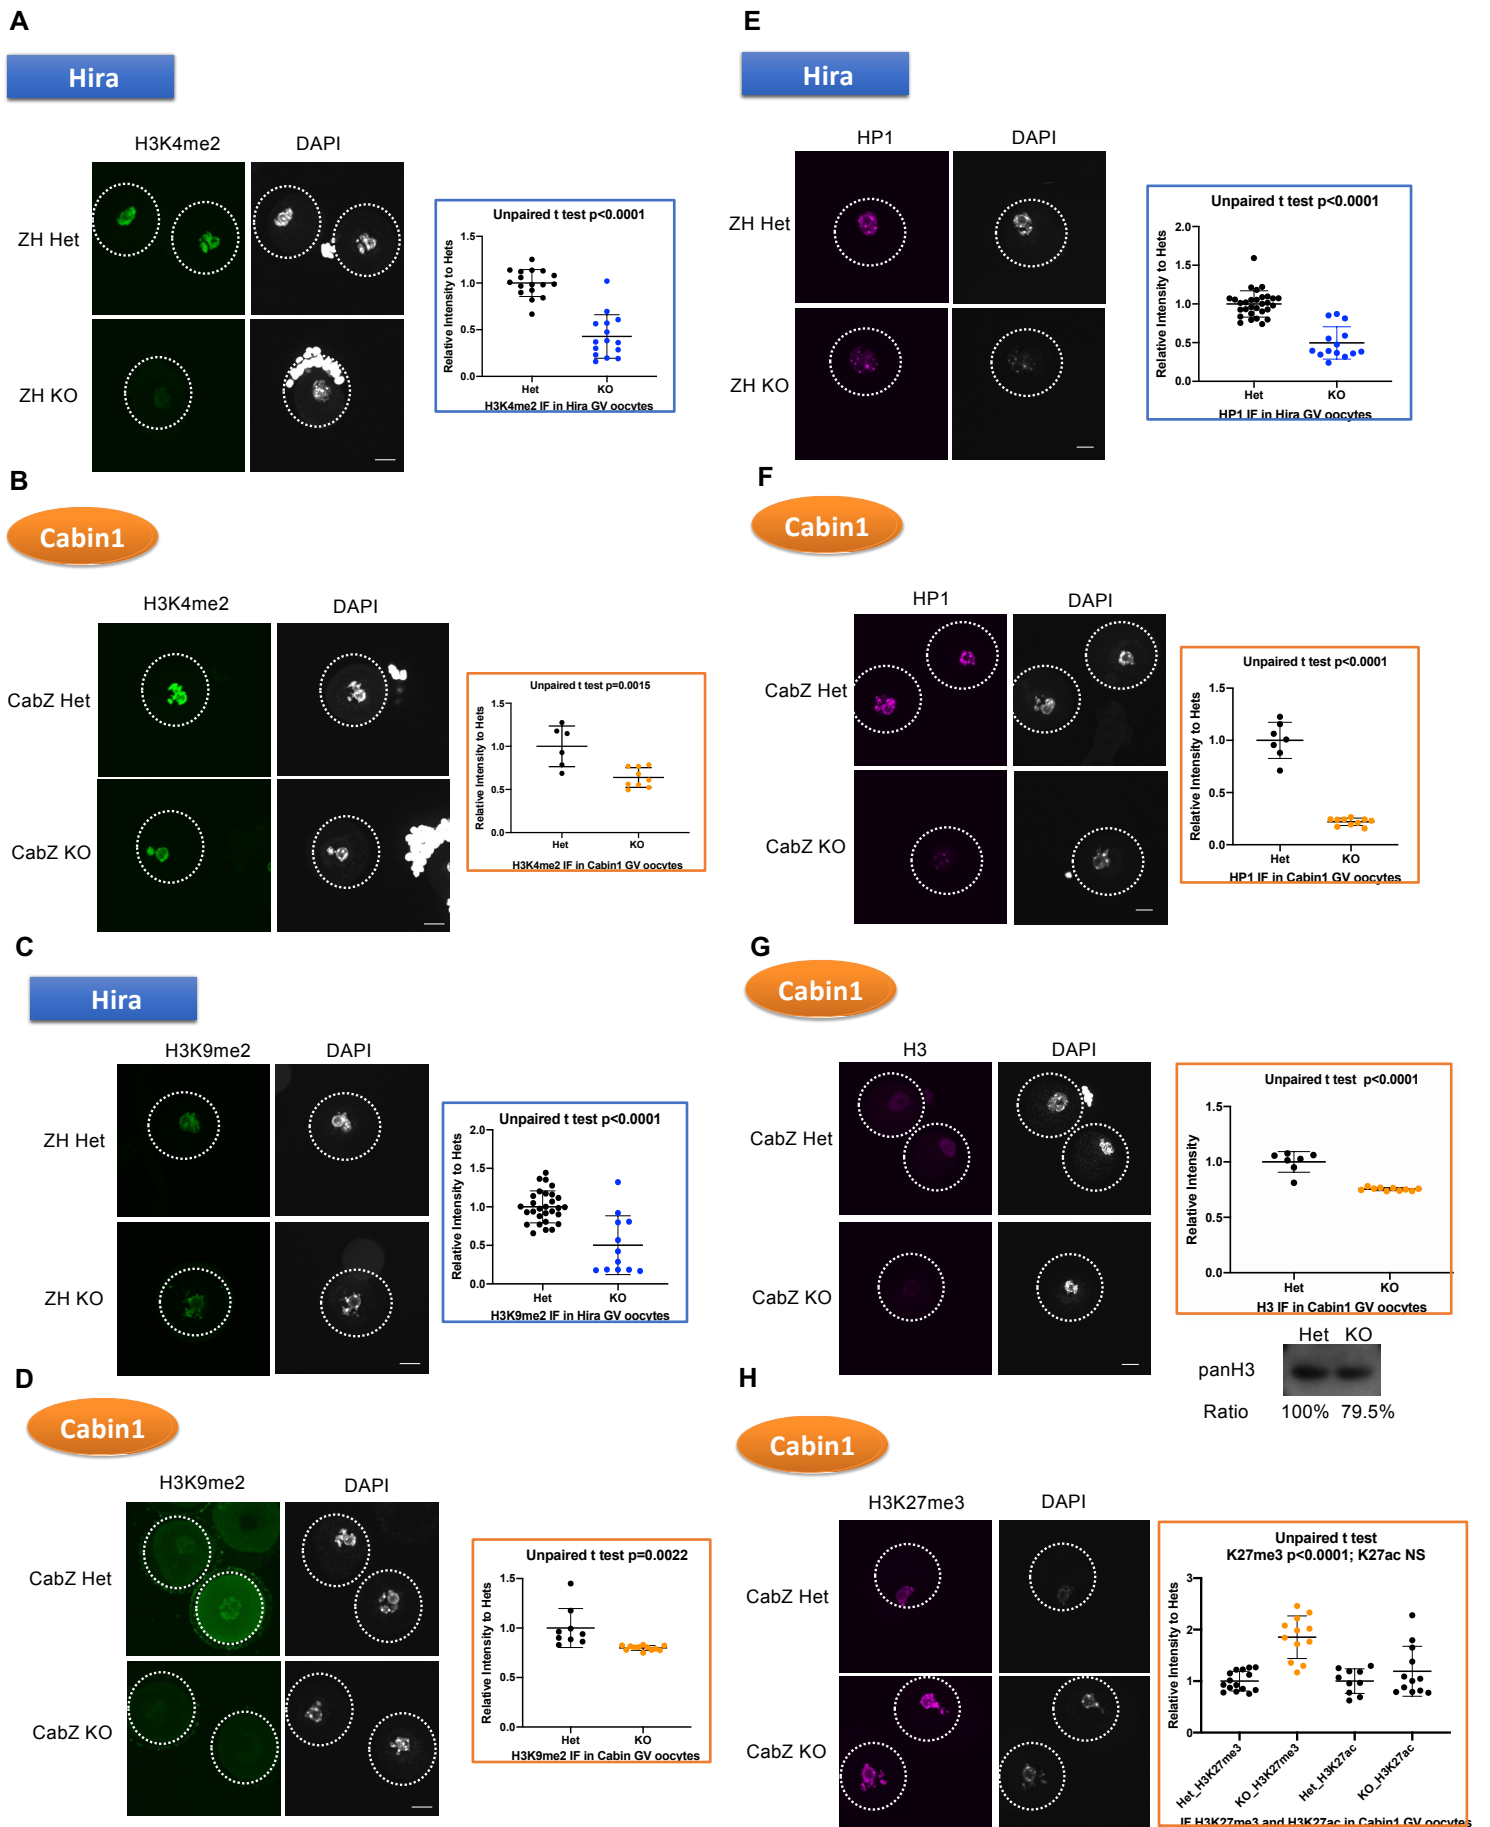

**Fig. S4. Hira complex is required for establishment of repressive histone and heterochromatin marks in GV oocytes.**

- (A) Hira mutant oocytes fail to establish H3K4me2. Immunofluorescent images (left panel) and quantification (right panel) of H3K4me2 in Hira mutant (ZH KO) and heterozygous control (ZH Het) oocytes.
- (B) Cabin1 mutant oocytes fail to establish H3K4me2. Immunofluorescent images (left panel) and quantification (right panel) of H3K4me2 in Cabin1 mutant (CabZ KO) and heterozygous control (CabZ Het) oocytes.
- (C) Hira mutant GV oocytes fail to establish H3K9me2. Immunofluorescent images (left panel) and quantification (right panel) of H3K9me2 in ZH KO and ZH Het oocytes.
- (D) Cabin1 mutant oocytes fail to establish H3K9me2. Immunofluorescent images (left panel) and quantification (right panel) of H3K9me2 in CabZ KO and CabZ Het oocytes.
- (E) Hira mutant oocytes failed to establish HP1. Immunofluorescent images (left panel) and quantification (right panel) of HP1 in ZH KO and ZH Het oocytes.
- (F) Cabin1 mutant GV oocytes failed to establish HP1. Immunofluorescent images (left panel) and quantification (right panel) of HP1 in CabZ KO and CabZ Het oocytes.
- (G) Overall histone H3 level was decreased in Cabin1 mutant oocytes. Immunofluorescent images (left panel), quantification (upper right panel), and western blot (lower right panel) of H3K4me3 in CabZ KO and CabZ Het oocytes.
- (H) The level of the H3K27me3 mark was upregulated in Cabin1 mutant GV oocytes while the H3K27ac mark remained. Immunofluorescent images (left panel) of H3K27me3 and quantification (right panel) of H3K27me3 and H3K27ac in CabZ KO and CabZ Het oocytes. Scale bar: 25mm

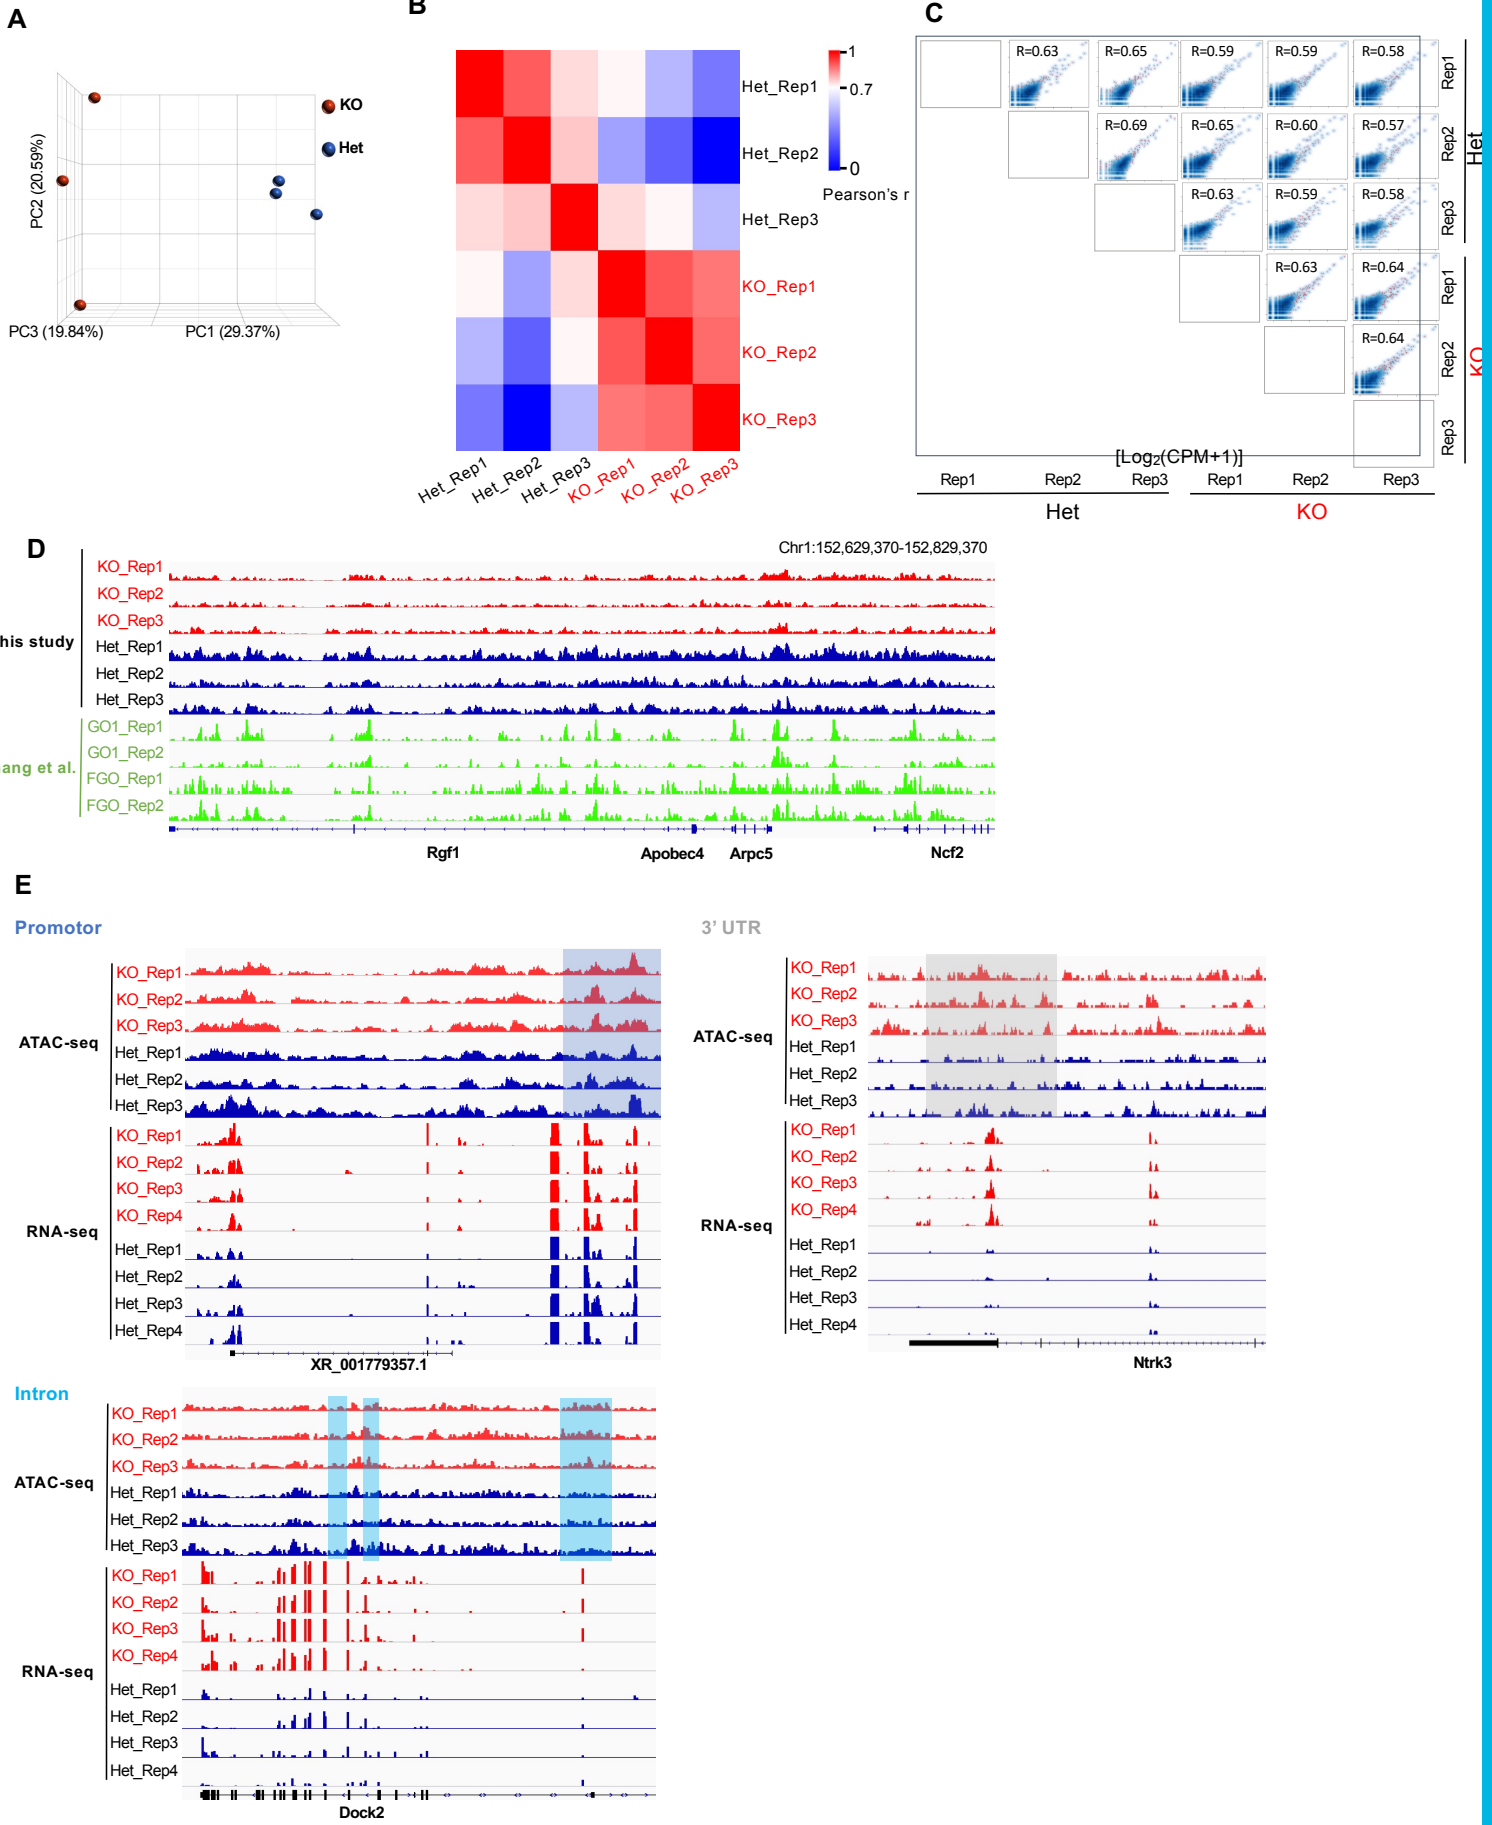

**Fig. S5. Global chromatin accessibility is affected in Cabin1 mutant GV oocytes.**

(A) Principal Component Analysis (PCA) of ATAC-seq peaks of Cabin1 oocytes, where the distance among samples was measured by the pairwise Pearson correlation and evaluated using the accessibility of 2,000bp genome bins.

(B) Hierarchical clustering of all samples, where the distance among samples was measured by the Pearson correlation. The colour spectrum, ranging from blue to red, indicates correlation from low to high.

(C) Scatter plots showing the correlation between the three ATAC-seq replicates of CabZ Het and KO oocytes.

(D) The genome browser view showing the enrichment of ATAC-seq peaks in both CabZ Het and KO oocytes, as well as the data from GO1 and FGO oocytes (Zhang et al., 2020) on the locus of chromosome1 152,629,370-152,829,370.

(E) Genome browser showing the ATAC-seq peaks and RNA-seq reads enrichment near gene promoter (i.e. XR\_001779357.1), 3'UTR (i.e. *Ntrk3*), and intron (i.e. Dock2) regions.

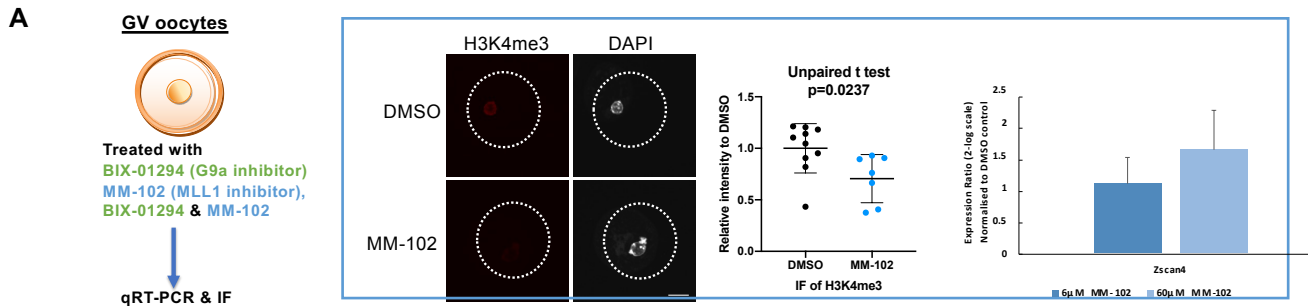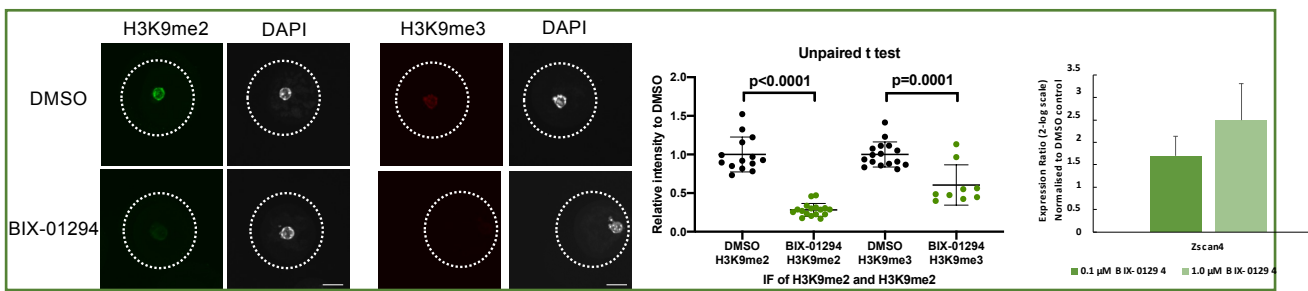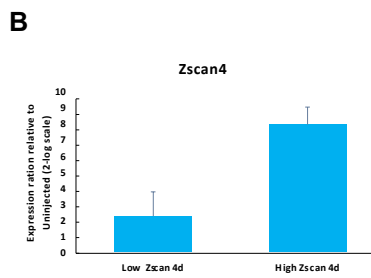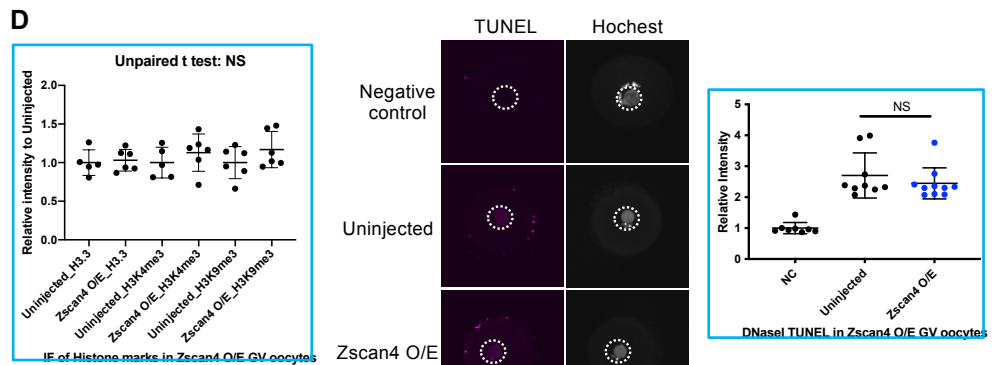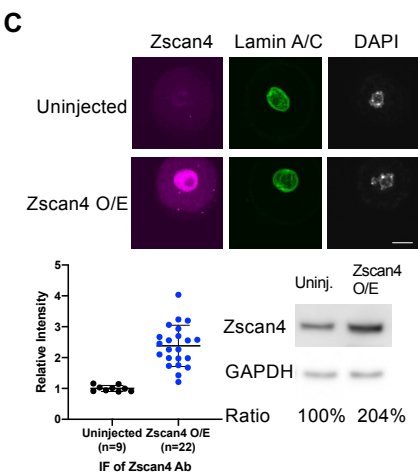

**E**

| Term                                                | P value  |
|-----------------------------------------------------|----------|
| Establishment of cell polarity                      | 3.10E-07 |
| Regulation of transcription, DNA-templated          | 5.10E-07 |
| Microtubule cytoskeleton organization               | 3.80E-05 |
| Negative regulation of cell differentiation         | 3.39E-03 |
| Negative regulation of transcription, DNA-templated | 5.01E-03 |
| Stem cell division                                  | 1.19E-02 |
| Blastocyst development                              | 1.29E-02 |
| Maturation of SSU-rRNA                              | 2.97E-02 |
| Spliceosomal complex assembly                       | 4.09E-02 |
| Nucleoside metabolic process                        | 4.49E-02 |
| Ribosomal small subunit assembly                    | 4.91E-02 |
| Spliceosomal snRNP assembly                         | 7.19E-02 |
| Regulation of cell growth                           | 7.62E-02 |
| Transcription, DNA-templated                        | 8.52E-02 |

CabZ 2C DE Zscan4 O/E 2C DE

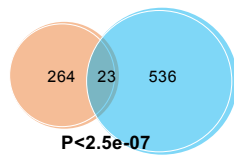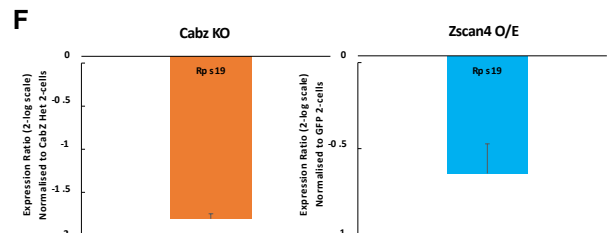



**Fig. S6. Zscan4 expression is regulated by repressive histone marks of H3K4me3 and H3K9me3.**

(A) Histone methyltransferase inhibitor experiments confirmed that Zscan4 expression is modulated by H3K4me3, H3K9me2, and H3K9me3 modifications. Oocytes were treated with BIX-01294 or MM-102 for 48hrs. IF was used to confirm the inhibition of target histone marks. qRT-PCR was used to confirm the upregulation of Zscan4 after inhibitor treatment.

(B) qRT-PCR validation of Zscan4 overexpression in oocytes. RNA concentration of low Zscan4 (300ng/ml) and high (1,500ng/ml).

(C) Confirmation of Zscan4 overexpression. Upper panel: immunofluorescence using antibody against Zscan4. Lower left panel: quantification of the IF images. Lower right panel: Western blot of Zscan4 overexpression in oocytes, GAPDH was used as a loading control (n=2).

(D) Overexpression of Zscan4 was unable to alter the level of H3.3, H3K4me3 and H3K9me3 by IF or global chromatin accessibility by DNaseI-TUNEL assay.

(E) RNA-seq result of overexpressed Zscan4 oocytes at 2-cell stages. Upper panel: Gene Ontology of RNA-seq result of overexpressed Zscan4

(Zscan4 O/E) 2-cells (2C) showed that regulation of transcription, blastocyst development, and ribosomal assembly related terms are among the top downregulated lists. Panel below: Venn-diagram represented the co-downregulated differentially expressed genes of Cabin1 mutant and overexpressed Zscan4 oocytes at 2-cell stages. For comparison, differential expression cutoff threshold has a false discovery rate (FDR) adjusted p-value of <0.05 and fold change >2. Significance of overlap assessed by hypergeometric test.

(F) qRT-PCR of CabZ KO and Zscan4 overexpressed 2-cells confirmed the downregulation of Rps19. Scale bar= 25mm.

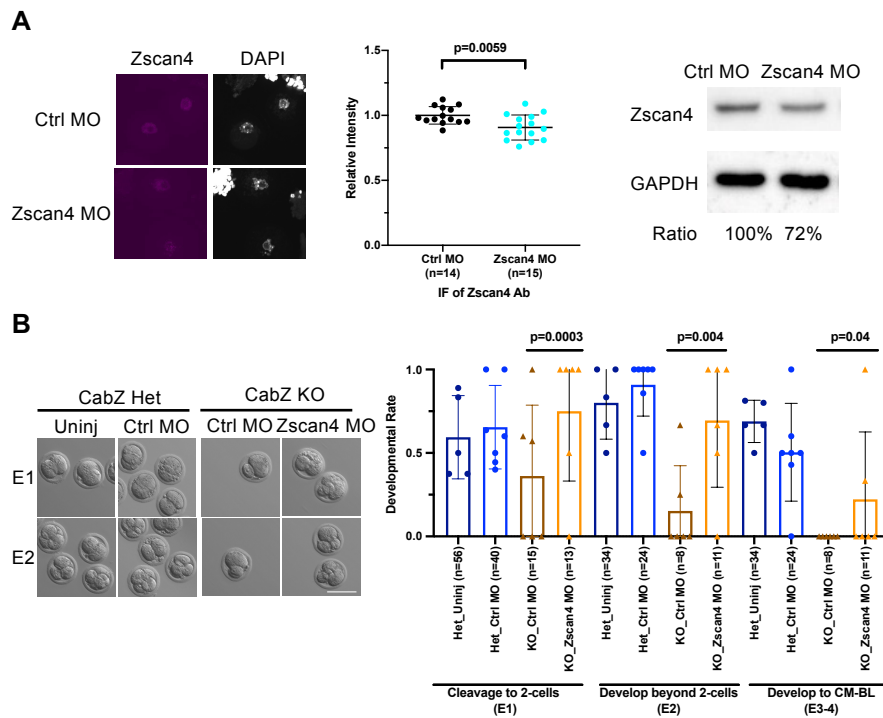

**Fig. S7. Downregulation of Zscan4 partially rescues the developmental potential of Cabin1 mutant oocytes.**

(A) Validation of Zscan4 knockdown in wild-type oocytes. Left panel: IF images and quantification of Zscan4 in Control morpholino (Ctrl MO) and Zscan4 MO injected oocytes. Right panel: Western blot and quantification of Zscan4 in Ctrl MO and Zscan4 MO injected oocytes. GAPDH was used as a loading control (n=2).

(B) Developmental progression of parthenogenesis embryos of CabZ Het and KO oocytes following morpholino microinjection. Left panel: Representative images of CabZ Het and KO oocytes under different treatments on embryonic day1 (E1) and day2 (E2).

Right panel: Quantification of developmental progression of embryos following microinjections. CabZ KO GV oocytes were microinjected with Ctrl and Zscan4 MO; CabZ Het GV oocytes were uninjected (Uninj) or injected with Ctrl MO, respectively. After injection, the oocytes were matured to MII followed by parthenogenesis, then monitored for cleavage and subsequent embryonic development. Developmental progressions were monitored on E1 by 2-cell formation, on E2 by development beyond 2-cells and on E3-E4 by development to morula-to-blastocyst stages.  $\chi^2$  p values were calculated for the developmental rate of Cabin1 KO embryos injected with Zscan4 and Control morpholinos. Scale bar=80mm.

**Table S1. Summary of ATAC-seq library mapping and data processing.**

| Sample ID  | No. of paired-end reads | No. of mapped reads | Mapping rates (%) | No. of ATAC-seq peaks |
|------------|-------------------------|---------------------|-------------------|-----------------------|
| CabZ Het_1 | 61728101                | 59691073            | 96.7              | 43399                 |
| CabZ Het_2 | 43749714                | 42502847            | 97.15             | 67074                 |
| CabZ Het_3 | 53986271                | 52830964            | 97.86             | 111327                |
| CabZ KO_1  | 46356933                | 43524524            | 93.89             | 46070                 |
| CabZ KO_2  | 52255421                | 50483962            | 96.61             | 19160                 |
| CabZ KO_3  | 63228286                | 60907807            | 96.33             | 29600                 |

**Table S2. Gene ontology analysis of the Cabin1 GV oocytes ATAC-seq data.**

[Click here to download Table S2](#)

**Table S3. Integrated analysis of the ATAC-seq and the RNA-seq datasets.**

[Click here to download Table S3](#)

**Table S4. List of antibodies used in this study.**

|                                    | Manufacturer           | Cat. No       | Dilution                      |
|------------------------------------|------------------------|---------------|-------------------------------|
| CABIN1                             | Abcam                  | 3349          | 1:500 for WB                  |
| CREST                              | Immuvision             | HCT-0100      | 1:500                         |
| GAPDH                              | Santa Cruz             | 97166         | 1:500                         |
| H3                                 | Abcam                  | ab1791        | 1:250 for IF;<br>1:500 for WB |
| H3K27ac                            | Abcam                  | ab177178      | 1:1000                        |
| H3K27me3                           | Diagenode              | C15410195     | 1:200                         |
| H3K4me2                            | Cosmo Bio              | MCA-MABI0003  | 1:1000                        |
| H3K4me3                            | Diagenode              | 1541003       | 1:500 for WB                  |
| H3K4me3                            | Millipore              | 04-745        | 1:250                         |
| H3K9me2                            | Abcam                  | ab1220        | 1:100                         |
| H3K9me3                            | Abcam                  | ab8898        | 1:500                         |
| HP1                                | Cell Signaling         | 8676T         | 1:250                         |
| Lamin A/C                          | Sigma                  | SAB 4200236   | 1:500                         |
| PoII PS2                           | Abcam                  | 193468        | 1:100                         |
| Zscan4                             | Gift                   | Minoru Ko lab | 1:250 for IF                  |
| Zscan4                             | Abcam                  | 97748         | 1:250 for WB                  |
| Peroxidase Donkey Anti-Rabbit      | Jackson ImmunoResearch | #711-035-152  | 1:10,000                      |
| Alexa Fluor 488 Donkey anti mouse  | ThermoFisher           | A21202        | 1:500                         |
| Alexa Fluor 568 Donkey anti rabbit | ThermoFisher           | A10042        | 1:500                         |
| Alexa Fluor 647 Donkey anti mouse  | Abcam                  | ab150107      | 1:500                         |

**Table S5. List of primers used in this study.**

|            |         |                         |
|------------|---------|-------------------------|
| Zscan4 (d) | Forward | TCCGTAGAGATGCCAAACTATTC |
|            | Reverse | GACAGGTGACACAAAGCAATTC  |
| Zscan4 (C) | Forward | TTGAAGCCTCCTGTCATGGTCC  |
|            | Reverse | TCCATTTCAATTTCCACTACAGC |
| Ddit3      | Forward | TGTTGAAGATGAGCGGGTG     |
|            | Reverse | AGGTTCTGCTTTCAGGTGTG    |
| Gm5039     | Forward | CCACTGTTAGATACTTCCTGGC  |
|            | Reverse | AAAAGGTAACCACAGGATCCG   |
| Rps19      | Forward | AAGTCCGGGAAGCTGAAAG     |
|            | Reverse | GAAGCAGCTCGTGTGTAGAA    |
